# Supplementary material for: Interacting Proteins on Human Spermatozoa: Adaptive Evolution of the Binding of Semenogelin I to EPPIN
Source: PubMed Central journal article supplement (PMC3846889; doi:10.1371/journal.pone.0082014), 2013-12-02
Supplement: pone.0082014.s001.pdf [file pone.0082014.s001.pdf]

## Supplementary Information

“Interacting Proteins on Human Spermatozoa: Adaptive Evolution of the Binding of Semenogelin I to EPPIN”

Erick J.R. Silva, Katherine G. Hamil, and Michael G. O’Rand

**Supplementary Table S1.** Likelihood ratio test between different evolutionary models for *EPPIN* (A) and *SEMG1* (B).

| Evolutionary model           | Degrees of Freedom | LRT     | P-value |
|------------------------------|--------------------|---------|---------|
| <b>(A) <i>EPPIN</i></b>      |                    |         |         |
| M1a (null) vs M2a (positive) | 2                  | 0.2600  | 0.8781  |
| M7 (null) vs M8 (positive)   | 2                  | 0.3446  | 0.8418  |
| <b>(B) <i>SEMG1</i></b>      |                    |         |         |
| M1a (null) vs M2a (positive) | 2                  | 14.0926 | 0.0009* |
| M7 (null) vs M8 (positive)   | 2                  | 14.0950 | 0.0009* |

Degree of freedom indicates the difference in the number of parameters between models; LRT (Log-likelihood ratio test) was calculated using the formula  $(-2[\text{Log}(\text{null}) - \text{Log}(\text{positive})])$  to compare the better fit model with the  $\chi^2$ -distribution; P-value is the probability that two models should differ in log likelihood as much as that observed, given the degree of freedom. \*P<0.05 was considered significant.
