# Supplementary material for: Interacting Proteins on Human Spermatozoa: Adaptive Evolution of the Binding of Semenogelin I to EPPIN
Source: PubMed Central journal article supplement (PMC3846889; doi:10.1371/journal.pone.0082014), 2013-12-02
Supplement: pone.0082014.s002.pdf [file pone.0082014.s002.pdf]

## Supplementary Information

“Interacting Proteins on Human Spermatozoa: Adaptive Evolution of the Binding of Semenogelin  
I to EPPIN”

Erick J.R. Silva, Katherine G. Hamil, and Michael G. O’Rand

**Supplementary Table S2.** Log-likelihood values and parameter estimates for *SEMG1*.

| Evolutionary model   | $p$ | Log likelihood | Estimates of parameters                                                            | Positive selected sites by BEB method (P>95%)                                                                        |
|----------------------|-----|----------------|------------------------------------------------------------------------------------|----------------------------------------------------------------------------------------------------------------------|
| M0 (one-ratio)       | 1   | -2183.66       | $\omega=1.67$                                                                      | N/A                                                                                                                  |
| M1a (nearly-neutral) | 2   | -2188.02       | $p_0=0.005(p_1=0.995),$<br>$\omega_0=0.000(\omega_1=1)$                            | N/A                                                                                                                  |
| M2a (selection)      | 4   | -2180.97       | $p_0=0.413, p_1=0.000(p=0.587),$<br>$\omega_0=0.595(\omega_1 = 1), \omega_2=2.534$ | 117D                                                                                                                 |
| M7 (beta)            | 2   | -2188.02       | $p=1.391, q=0.005$                                                                 | N/A                                                                                                                  |
| M8 (beta& $\omega$ ) | 4   | -2180.97       | $p_0=0.413(p_1=0.587), p_2=99.000,$<br>$q=66.515, \omega=2.53414$                  | 73A, 97Q, 117D, 125R,<br><b>167W, 169H, 184G, 186K,</b><br><b>192S, 194Y, 203A, 208R,</b><br><b>211K, 239C, 245K</b> |

$p$  indicates the number of parameters in the  $\omega$  distribution; Data were based on a non-rooted tree; single letter amino acid designation. There were a total of 256 positions in the dataset. Residues within SEMG1 fragment 74-8 (R165-Q247) are shown in bold.
